# Supplementary material for: Crystallisation and physicochemical property characterisation of conformationally-locked co-crystals of fenamic acid derivatives
Source: Royal Society of Chemistry journal article supplement (doi:10.1039/c5ce00297d), 2015-01-01
Supplement: c5ce00297d1.pdf [file c5ce00297d1.pdf]

## Crystallisation and physicochemical property characterisation of conformationally-locked co-crystals of fenamic acid derivatives

K. E. Wittering,<sup>a,b</sup> L. R. Agnew,<sup>a,b</sup> A. R. Klapwijk,<sup>a,b</sup> K. Robertson,<sup>a,b</sup> A. J. P. Cousen,<sup>a,b</sup> D. L. Cruickshank,<sup>\*a</sup> and C. C. Wilson<sup>\*a</sup>

<sup>a</sup> Department of Chemistry, University of Bath, Bath, BA2 7AY

<sup>b</sup> Engineering and Physical Sciences Research Council (EPSRC) Centre for Innovative Manufacturing in Continuous Manufacturing and Crystallisation (CMAC), University of Bath, Bath, BA2 7AY

c.c.wilson@bath.ac.uk, dyanne.cruickshank@uct.ac.za

### Supporting information

**Table S1.** All variables investigated during the co-crystal screening studies\*

| API             | Co-former                                | Ratio (API:co-former) | Solvent           | Crystallisation temperature (°C) |
|-----------------|------------------------------------------|-----------------------|-------------------|----------------------------------|
| Fenamic acid    | Urea <sup>§</sup>                        | 1:1                   | Methanol          | 4                                |
| Flufenamic acid | Oxalic acid                              | 2:1                   | Isopropanol       | 18                               |
| Mefenamic acid  | Isonicotinamide                          | 1:2                   | Dimethylformamide | 30                               |
| Tolfenamic acid | Nicotinic acid <sup>§</sup>              |                       | Ethanol           | 50                               |
|                 | 4-aminobenzoic acid                      |                       | Acetone           |                                  |
|                 | 2-aminobenzoic acid                      |                       | Tetrahydrofuran   |                                  |
|                 | Pyridoxine <sup>§</sup>                  |                       |                   |                                  |
|                 | Isonicotinic acid hydrazide <sup>§</sup> |                       |                   |                                  |
|                 | 4,4'-bipyridyl                           |                       |                   |                                  |
|                 | 2,2'-bipyridyl                           |                       |                   |                                  |
|                 | 2-aminopyridine                          |                       |                   |                                  |

<sup>§</sup>Classified as GRAS by the Select Committee on GRAS Substances (SCOGS)

**\*Note.** The crystallisations were prepared using the minimal solvent required for dissolution with the aid of a sonic bath (30 °C). All combinations of API, co-former and ratio stated in Table S1 were tested with one or more of the solvents listed dependant on solubility, so not all possible solvents were used for each combination. The maximum crystallisation temperature used was appropriate to the boiling point of the solvent used. Whilst co-crystals for all fenamic acid derivatives with 4,4'-bipyridine have been reported previously<sup>1-3</sup> these combinations have been included in this study but with a wider range of permutations than previously reported. Despite this extensive study only 4,4'-bipyridine yielded co-crystals.

## Powder X-ray Diffraction Data

**Fig. S1** PXRD patterns of the co-crystals obtained from evaporative methods and liquid assisted grinding (LAG).

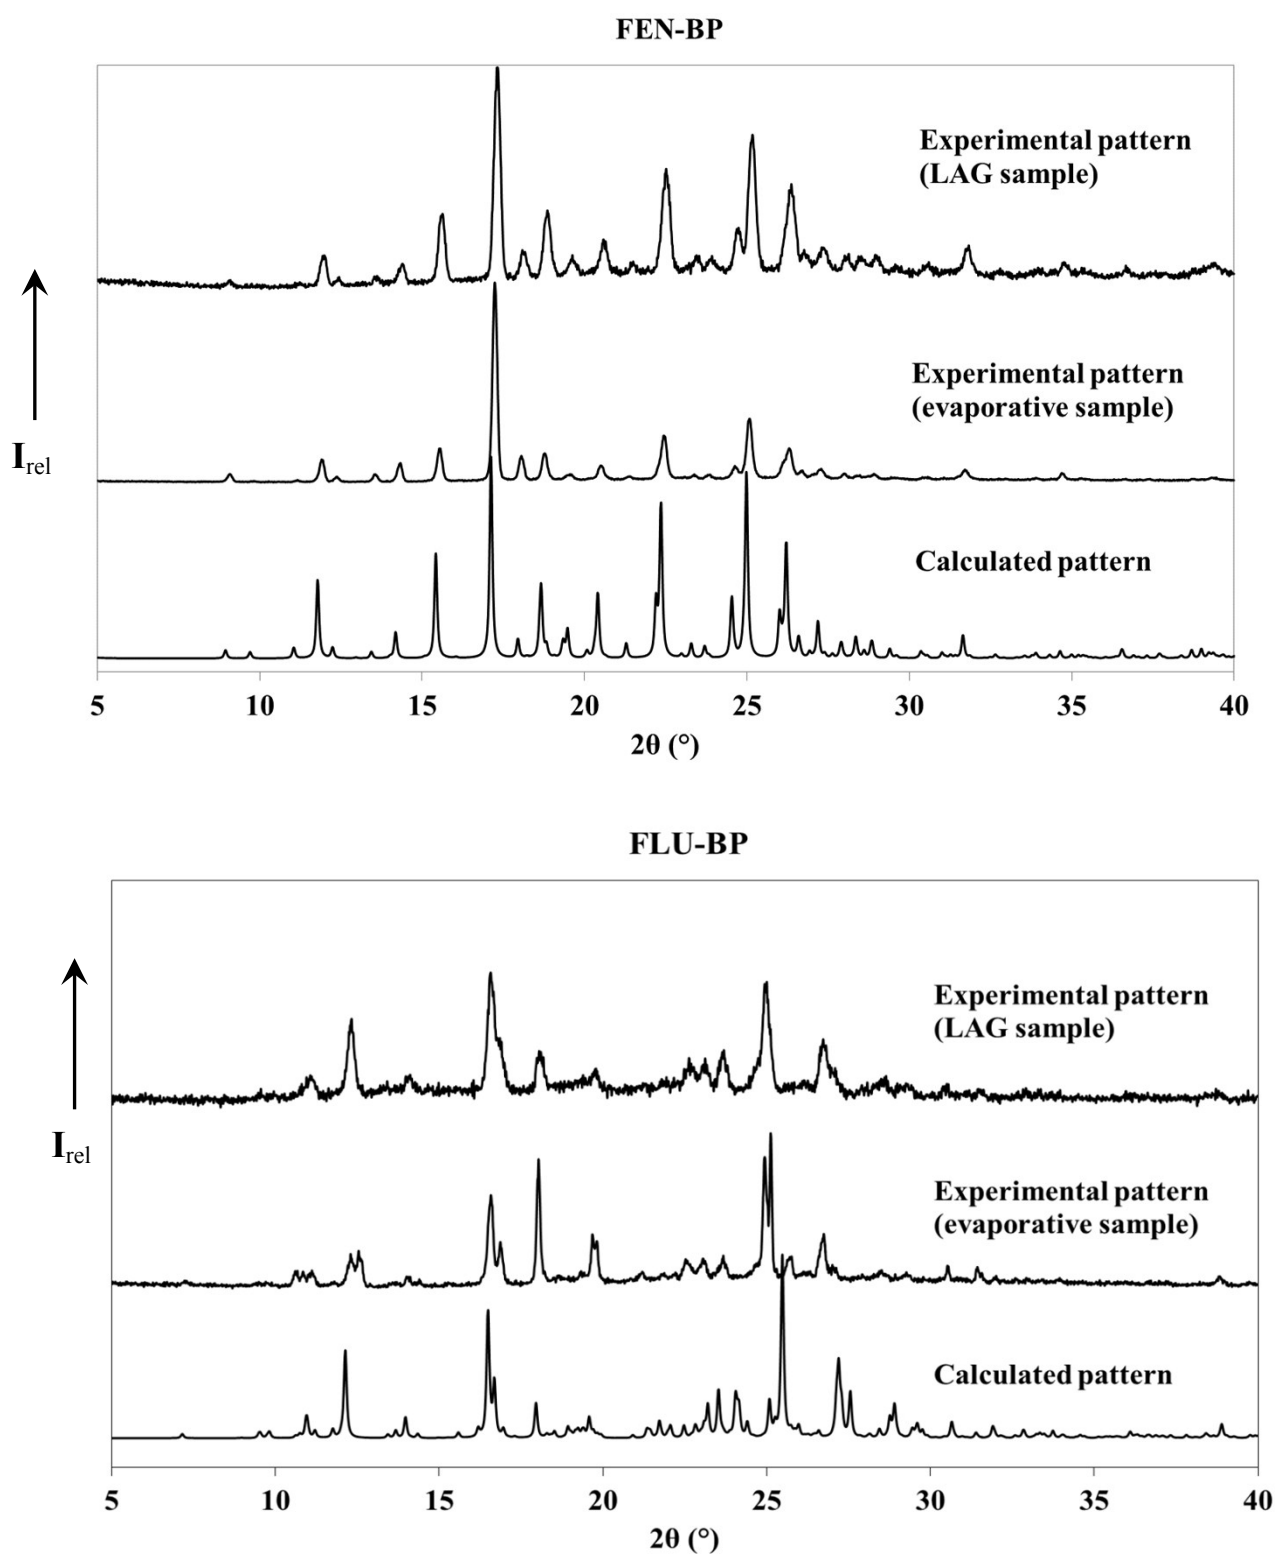

### MEF-BP

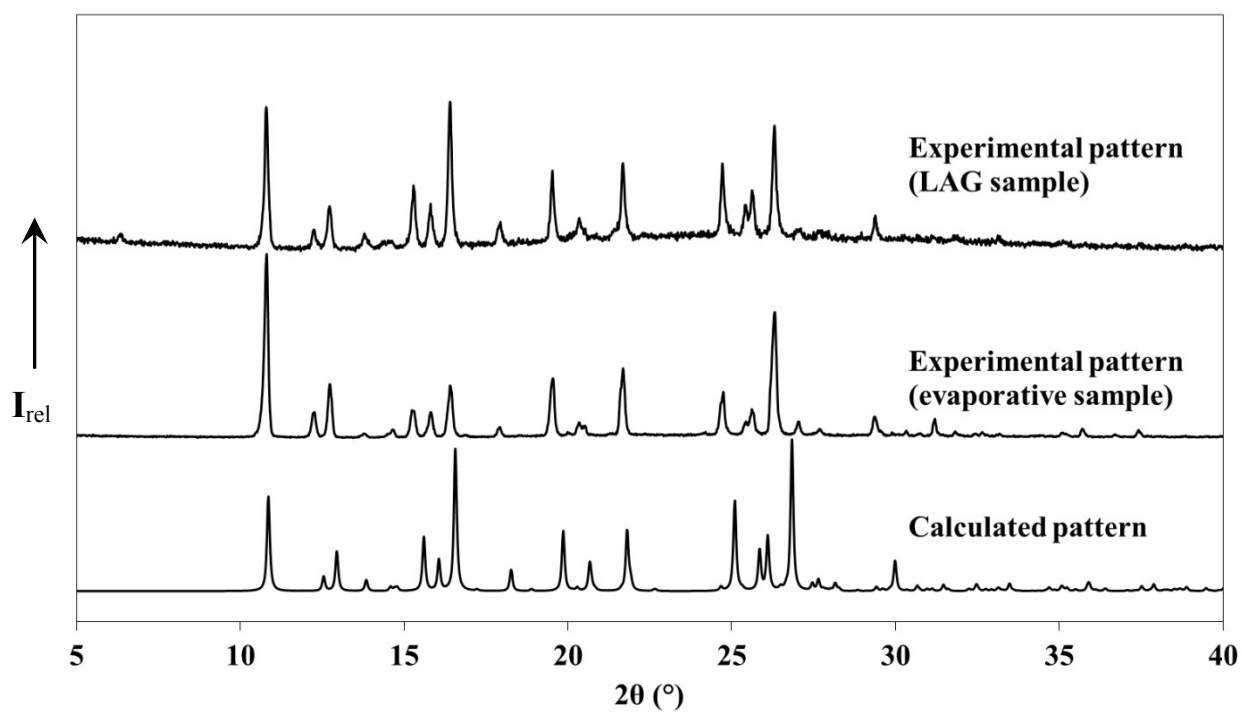

### TOL-BP

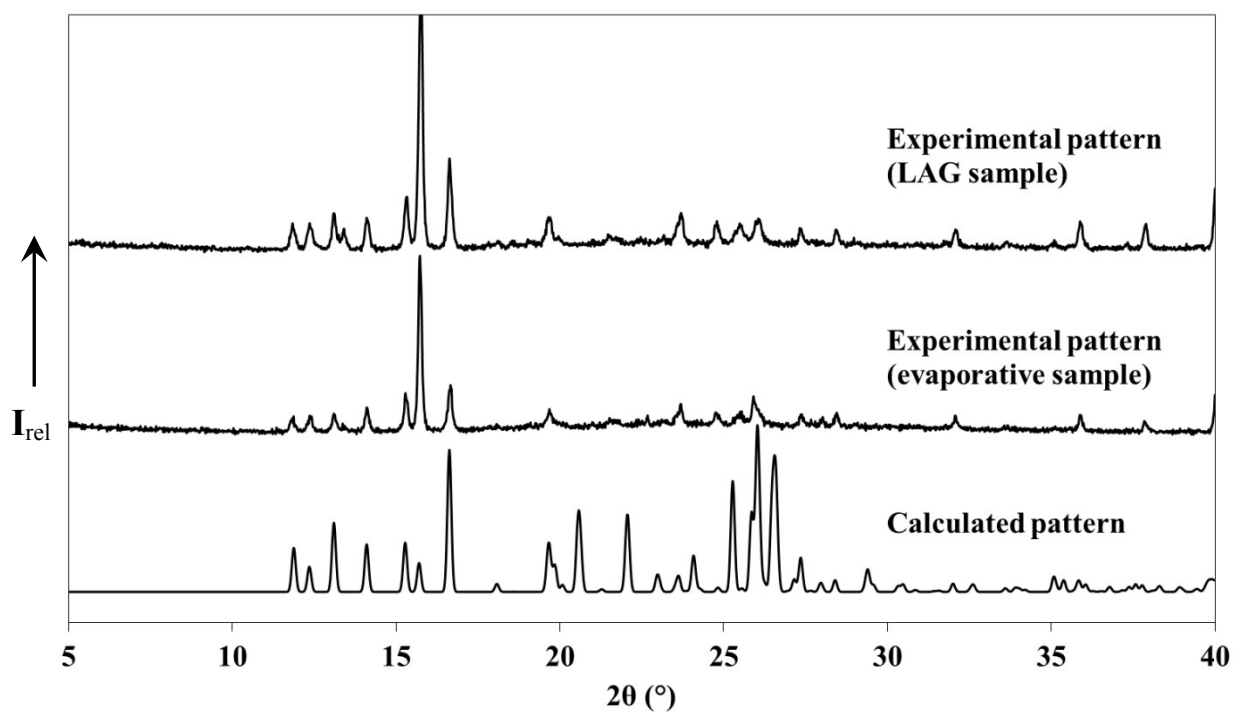

## Crystallographic data

**Table S2** Crystal data and structural refinement parameters for MEF-BP, TOL-BP and FLU-BP

| Compound                                     | MEF-BP                                                                           | TOL-BP                                                                             | FLU-BP                                                                                     |
|----------------------------------------------|----------------------------------------------------------------------------------|------------------------------------------------------------------------------------|--------------------------------------------------------------------------------------------|
| Formula unit                                 | $2\text{C}_{15}\text{H}_{15}\text{NO}_2 \cdot \text{C}_{10}\text{H}_8\text{N}_2$ | $2\text{C}_{14}\text{H}_{12}\text{ClNO}_2 \cdot \text{C}_{10}\text{H}_8\text{N}_2$ | $2\text{C}_{14}\text{H}_{10}\text{F}_3\text{NO}_2 \cdot \text{C}_{10}\text{H}_8\text{N}_2$ |
| $M_r$                                        | 319.37                                                                           | 339.79                                                                             | 1077.97                                                                                    |
| Crystal system                               | Triclinic                                                                        | Monoclinic                                                                         | Triclinic                                                                                  |
| Space group                                  | $P\bar{1}$                                                                       | $P2_1/c$                                                                           | $P\bar{1}$                                                                                 |
| $a/\text{\AA}$                               | 7.3086(3)                                                                        | 4.7081(2)                                                                          | 9.8293(4)                                                                                  |
| $b/\text{\AA}$                               | 8.6692(4)                                                                        | 45.220(1)                                                                          | 10.3830(6)                                                                                 |
| $c/\text{\AA}$                               | 13.6320(5)                                                                       | 7.9188(3)                                                                          | 24.991(1)                                                                                  |
| $\alpha/^\circ$                              | 106.135(4)                                                                       | 90                                                                                 | 84.684(4)                                                                                  |
| $\beta/^\circ$                               | 99.428(4)                                                                        | 106.896(5)                                                                         | 81.333(4)                                                                                  |
| $\gamma/^\circ$                              | 98.758(4)                                                                        | 90                                                                                 | 71.773(4)                                                                                  |
| $V/\text{\AA}^3$                             | 800.46(6)                                                                        | 1613.1(1)                                                                          | 2392.1(2)                                                                                  |
| No. of formula units per unit cell, $Z$      | 1                                                                                | 2                                                                                  | 3                                                                                          |
| Crystal size/ $\text{mm}^3$                  | $0.20 \times 0.15 \times 0.10$                                                   | $0.20 \times 0.18 \times 0.08$                                                     | $0.13 \times 0.11 \times 0.08$                                                             |
| $\rho$ (calcd)/ $\text{M g m}^{-3}$          | 1.325                                                                            | 1.399                                                                              | 1.497                                                                                      |
| $\mu/\text{mm}^{-1}$                         | 0.086                                                                            | 0.251                                                                              | 0.122                                                                                      |
| $F(000)$                                     | 338                                                                              | 708                                                                                | 1110                                                                                       |
| $\theta$ Range for data collection/ $^\circ$ | 2.89 - 29.64                                                                     | 3.01 - 26.37                                                                       | 2.80 - 25.35                                                                               |
| Reflections collected                        | 17917                                                                            | 11680                                                                              | 19891                                                                                      |
| No. of unique data                           | 4011                                                                             | 3267                                                                               | 8741                                                                                       |
| $[R(\text{int})]$                            | [0.0444]                                                                         | [0.0387]                                                                           | [0.0545]                                                                                   |
| No. of data with $I > 2\sigma(I)$            | 2899                                                                             | 2460                                                                               | 4684                                                                                       |
| Final $R(I > 2\sigma(I))$                    | 0.0485                                                                           | 0.0520                                                                             | 0.0692                                                                                     |
| Final $wR_2$ (all data)                      | 0.1137                                                                           | 0.1053                                                                             | 0.2055                                                                                     |

## Crystal structure description

The crystal structures of MEF-BP and TOL-BP (both form as 2:1 API:BP complexes)<sup>1</sup> contain the common acid-pyridine hydrogen bonded heterosynthon and intramolecular N-H $\cdots$ O hydrogen bond (Fig S2, Table S3) that has been seen previously in the other co-crystals of fenamic acid derivatives with BP.<sup>2,3</sup> The contents of the asymmetric units of MEF-BP and TOL-BP, however, comprise one API molecule and half a BP molecule which is in contrast to the previously reported 2:1 co-crystals of FLU-BP and FEN-BP that have three and two API molecules in the asymmetric unit, respectively. The dihedral angles relating the mean planes of the phenyl rings for each API molecule in the FLU-BP and FEN-BP structures are considerably different, ranging from 49 to 70 $^\circ$  for FEN-BP and from 41 to 47 $^\circ$  for FLU-BP. The MEF-BP co-crystal displays the largest angle between the mean planes of the phenyl rings of 79.05(4) $^\circ$ .

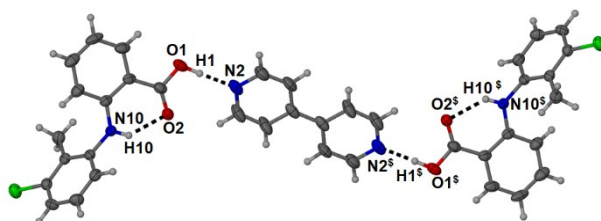

**Fig. S2** The inter- and intramolecular hydrogen bonds of TOL-BP as a representative diagram for the two crystal structures discussed herein.

**Table S3** Geometrical parameters for the significant hydrogen bonds of MEF-BP and TOL-BP

| Hydrogen bond                      | $d(\text{H}\cdots\text{A})/\text{\AA}$ | $d(\text{D-H}\cdots\text{A})/\text{\AA}$ | $\angle(\text{D-H}\cdots\text{A})/^\circ$ |
|------------------------------------|----------------------------------------|------------------------------------------|-------------------------------------------|
| <b>MEF-BP</b>                      |                                        |                                          |                                           |
| O1-H1 $\cdots$ N2 <sup>a</sup>     | 1.72(2)                                | 2.682(2)                                 | 178(2)                                    |
| N10-H10 $\cdots$ O2                | 1.94(2)                                | 2.656(1)                                 | 137(2)                                    |
| <b>TOL-BP</b>                      |                                        |                                          |                                           |
| O1-H1 $\cdots$ N2 <sup>b</sup>     | 1.75(4)                                | 2.674(4)                                 | 176(3)                                    |
| N10-H10 $\cdots$ O2                | 1.99(2)                                | 2.659(3)                                 | 138(2)                                    |
| C14-H14 $\cdots$ Cl18 <sup>c</sup> | 2.81(2)                                | 3.634(2)                                 | 146(2)                                    |

<sup>a</sup> x, 1+y, z; <sup>b</sup> 1+x, y, z; <sup>c</sup> -1+x, 1/2-y, -1/2+z

The overall packing arrangements of MEF-BP and TOL-BP are significantly different from one another. The bipyridine molecule of MEF-BP lies co-planar with the benzoic acid group of mefenamic acid. These co-planar sections are positioned along the (2 -1 1) planes. The semi-perpendicular dimethyl phenyl rings form  $\pi$ - $\pi$  interactions with their inversion-related counterparts (Fig S3) and two weak C-H $\cdots$ O interactions further stabilise the co-crystal and lock the conformation of MEF. The 4,4'-bipyridine molecule of TOL-BP is not co-planar to the benzoic acid group of tolfeamic acid (27(2) $^\circ$  angle between the mean planes; Fig S4.) which results in extended, twisted TOL-BP-TOL trimer units. The chlorine atoms form weak hydrogen bonds to a phenyl C-atom (C-H $\cdots$ Cl, 3.634(2)  $\text{\AA}$ , 146(2) $^\circ$ ). Further detailed structural descriptions and comparisons for MEF-BP, TOL-BP and other previously published fenamates with 4,4-bipyridine have been highlighted in the Surov et al paper.<sup>1</sup>

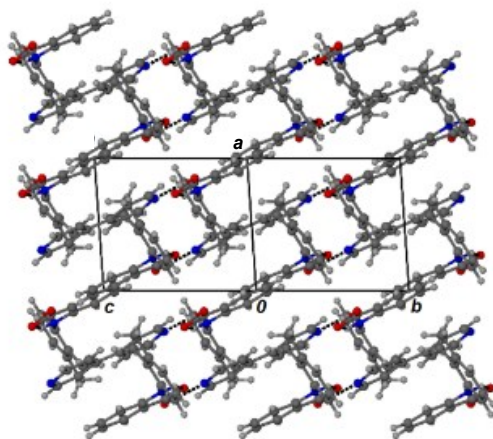**Fig. S3** The packing arrangement of the MEF-BP co-crystal as viewed along [011]

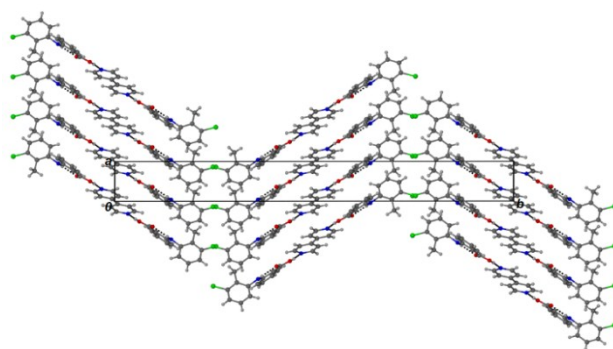

**Fig. S4** A packing diagram of TOL-BP as viewed down the c-axis illustrating the non-planar relationship between the API and 4,4'-bipyridine molecules

**Table S4.** Melting points of the various polymorphs of mefenamic, tolfeamic and flufenamic <sup>4-6</sup> as well as their co-crystals with 4,4'-bipyridine. All temperatures are reported in °C

| Polymorph  | Mefenamic acid   | Tolfenamic acid     | Flufenamic acid    |
|------------|------------------|---------------------|--------------------|
| I          | -†               | 213.10 <sup>5</sup> | 134.5 <sup>6</sup> |
| II         | 229 <sup>4</sup> | 213.52 <sup>5</sup> | 129.6 <sup>6</sup> |
| III        | -‡               | 214.09 <sup>5</sup> | 127.4 <sup>6</sup> |
| IV         | -                | 206.78 <sup>5</sup> | 123.9 <sup>6</sup> |
| V          | -                | 215.17 <sup>5</sup> | 124.9 <sup>6</sup> |
| VI         | -                | -                   | 124.2 <sup>6</sup> |
| VII        | -                | -                   | 120.7 <sup>6</sup> |
| BP Complex | 163              | 156                 | 128                |

† Converts to form II upon heating

‡ Converts to form I at ambient temperature and form II upon heating

**Fig. S5** FTIR spectra of the new fenamic acid derivative co-crystals and their individual components

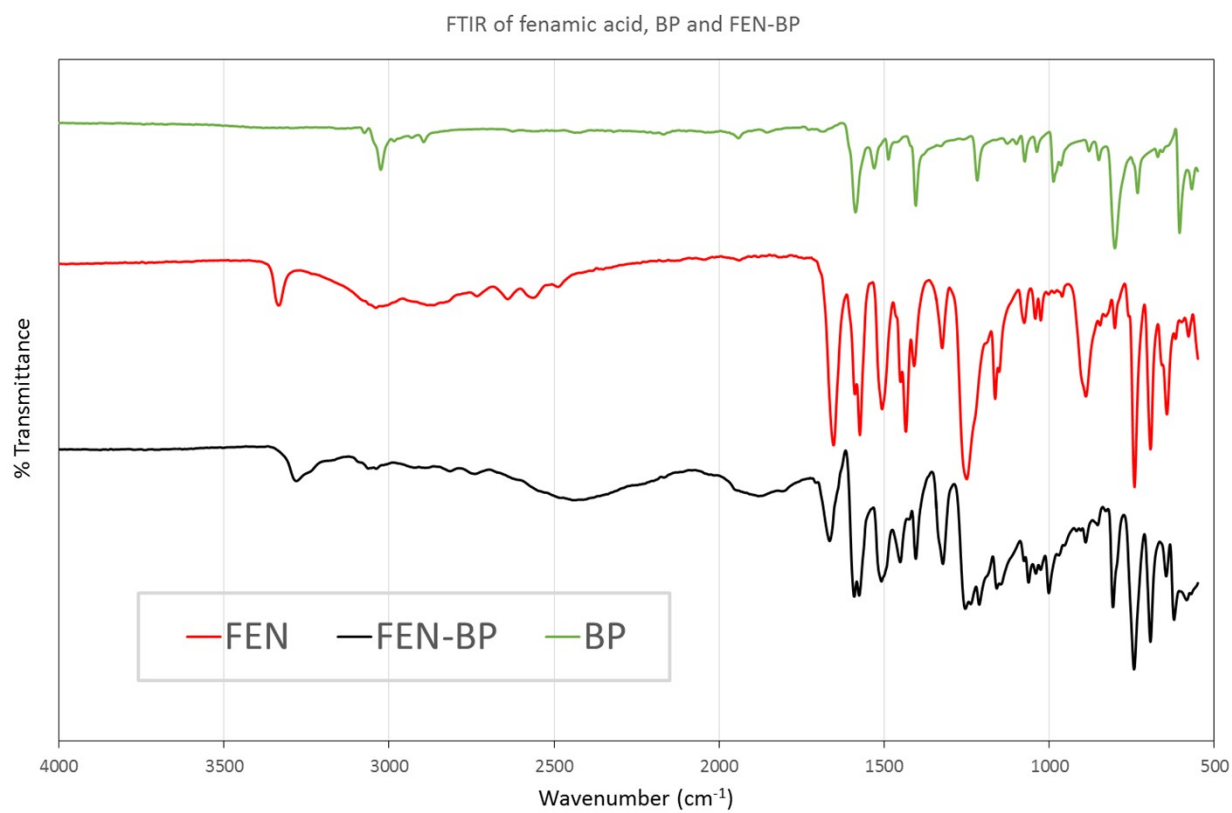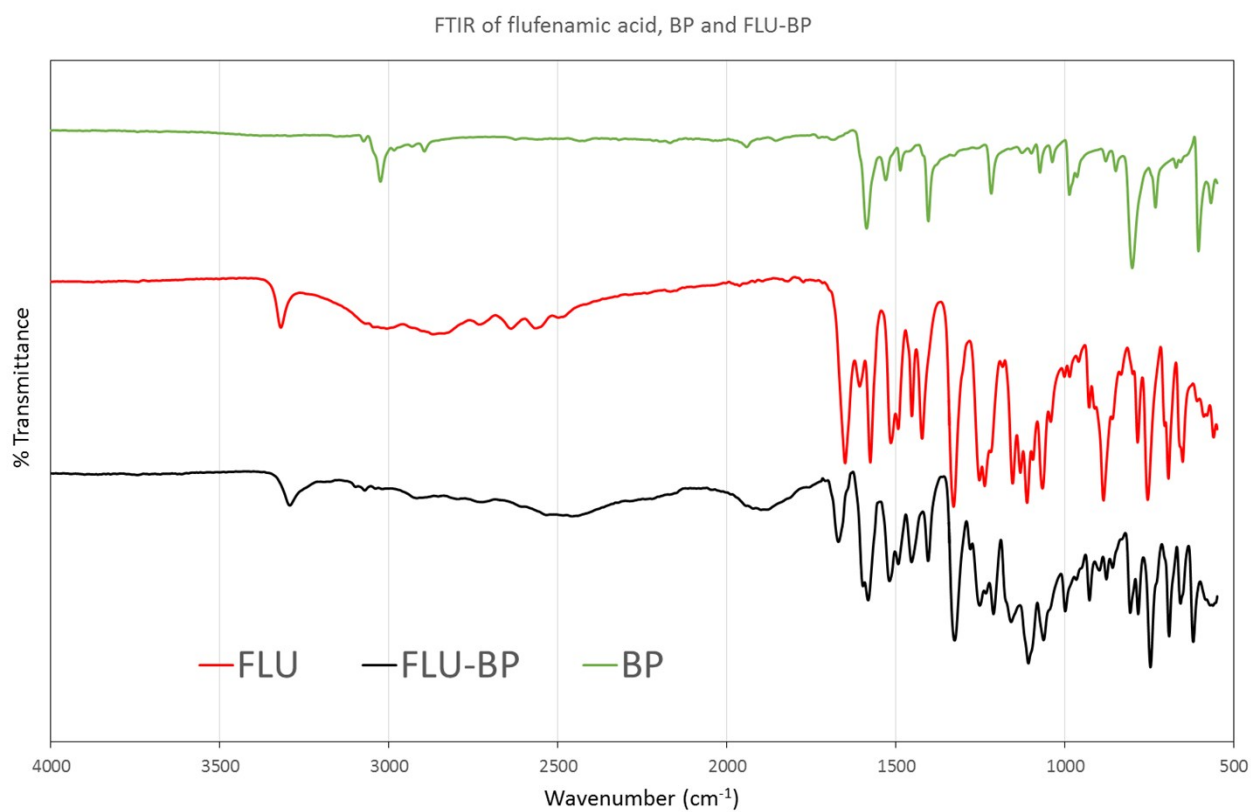

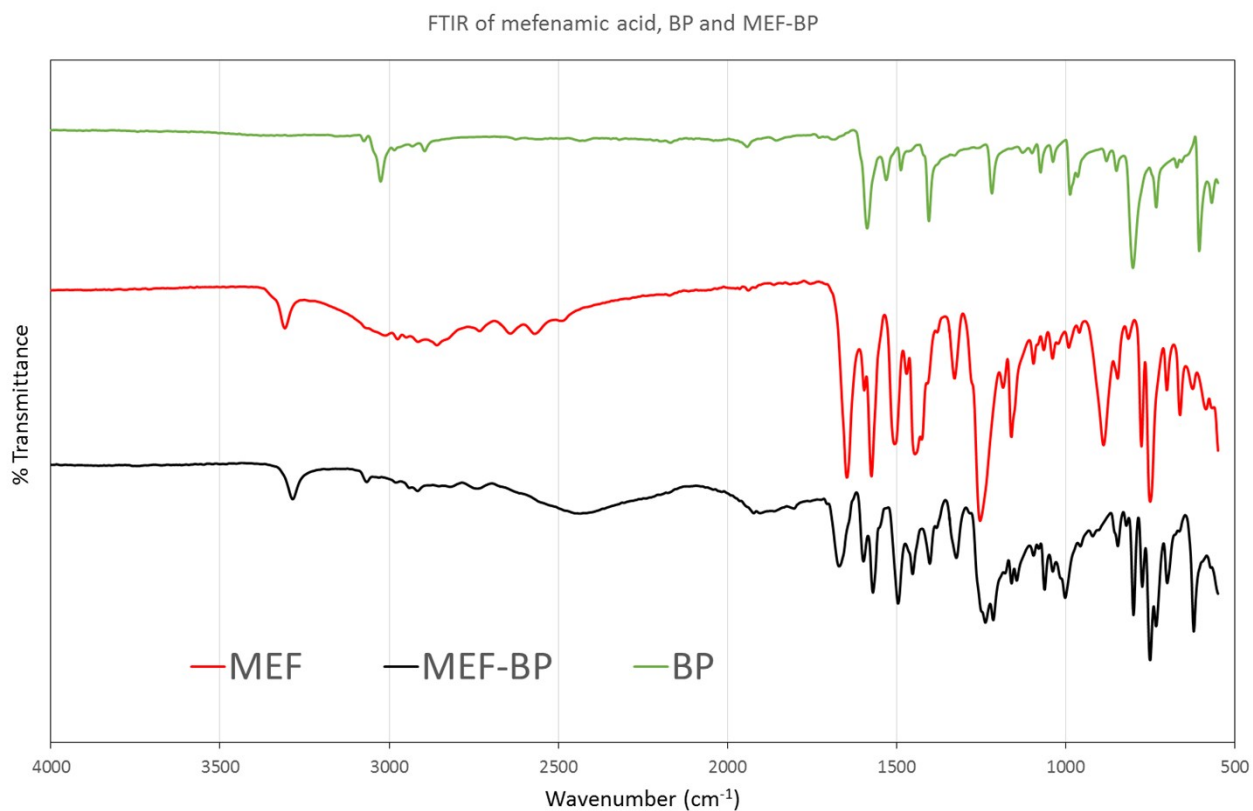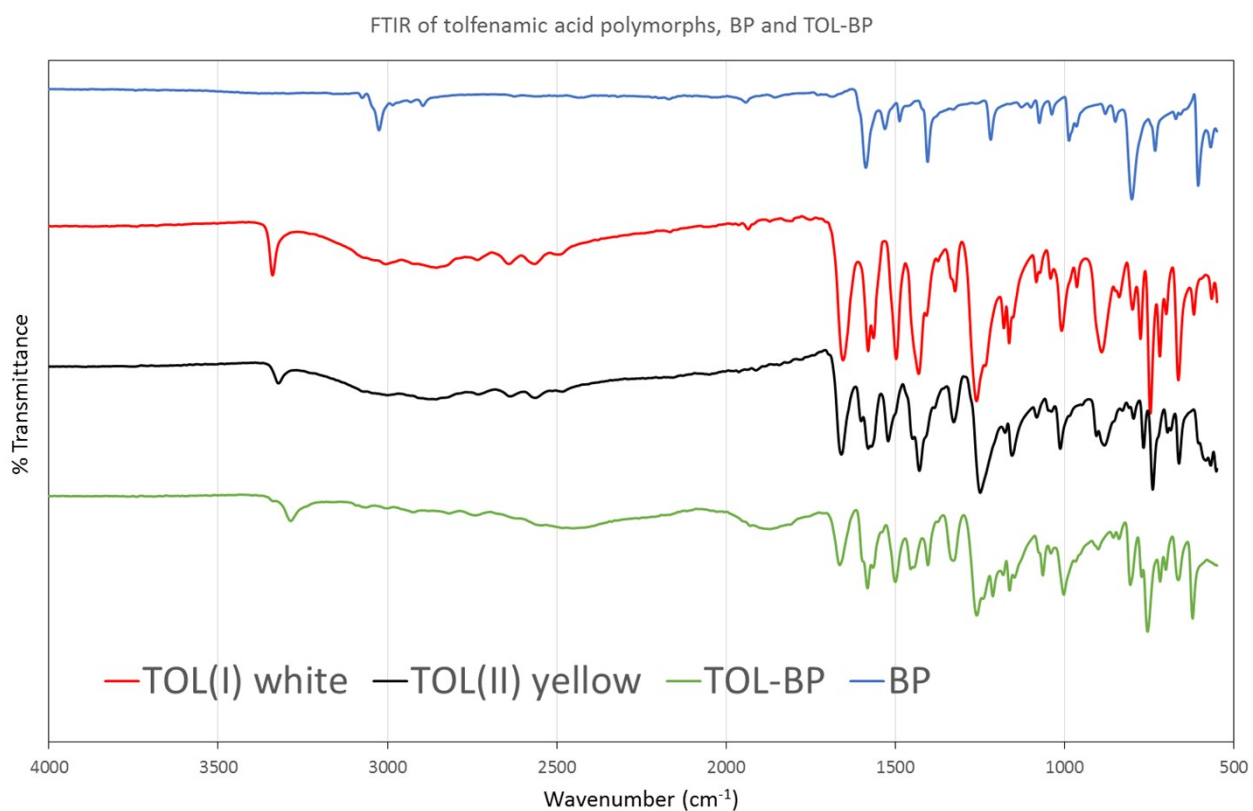



**Fig. S6** PXRD patterns illustrating the stability of the fenamic acid derivatives in their native form and their respective co-crystals with 4,4'-bipyridine under moderate humidity conditions (24 °C and 45 % R.H.)

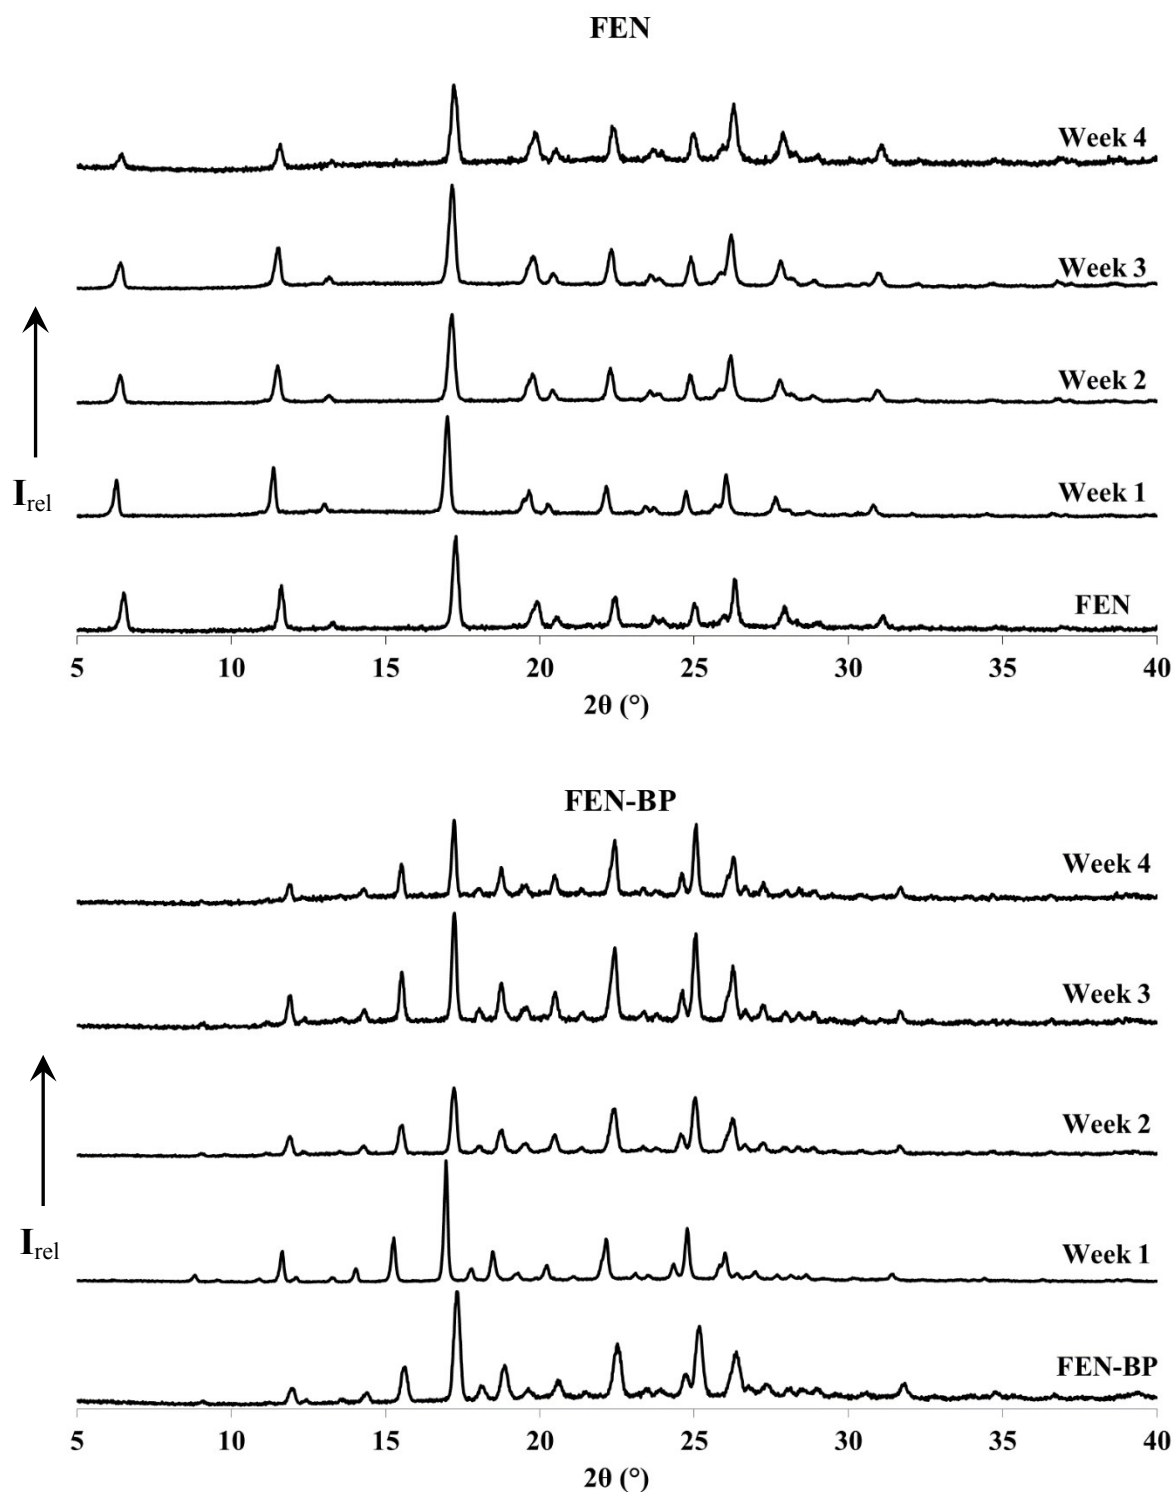

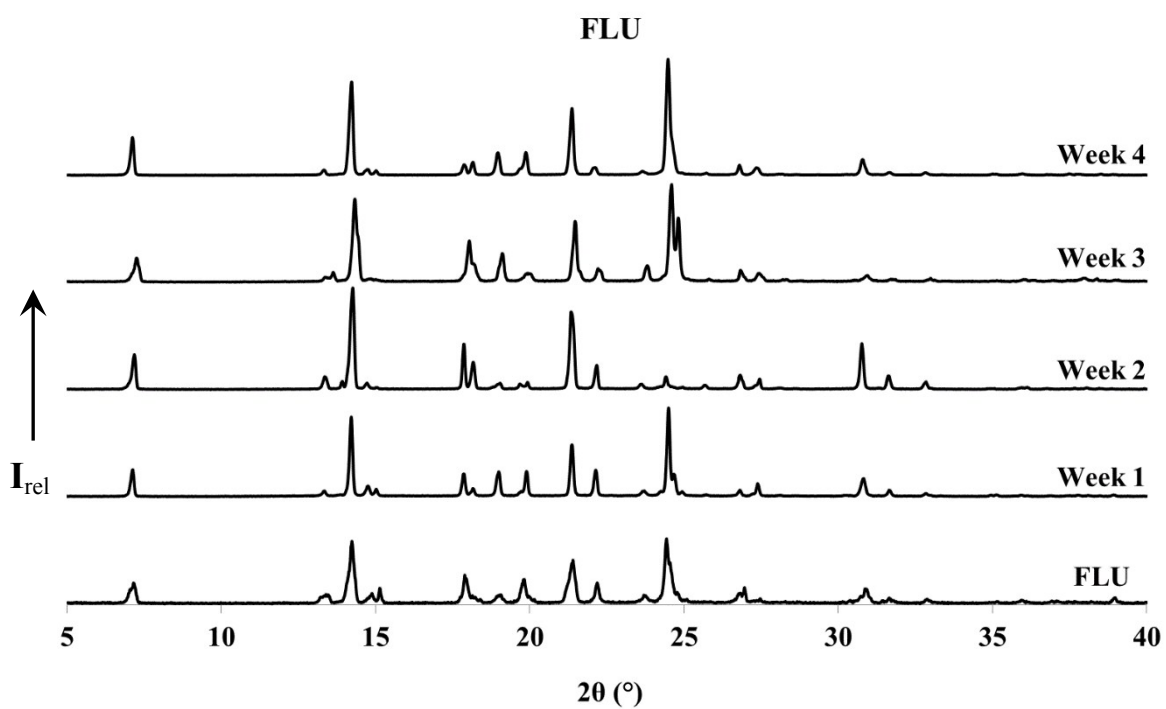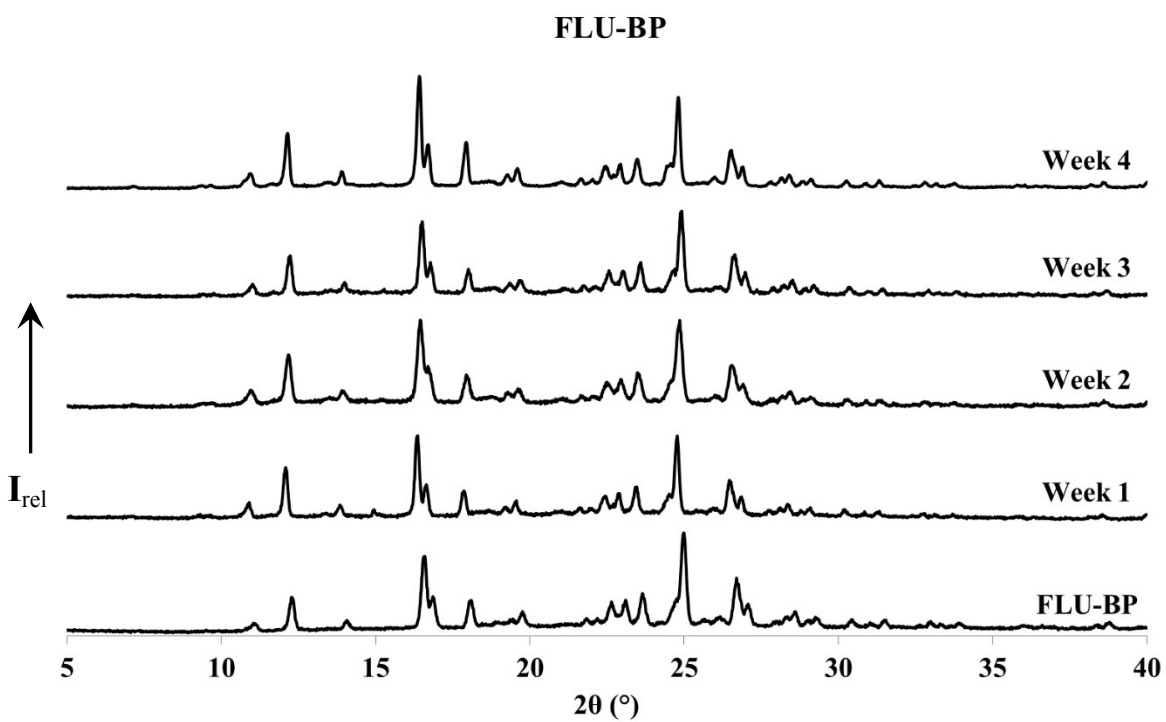

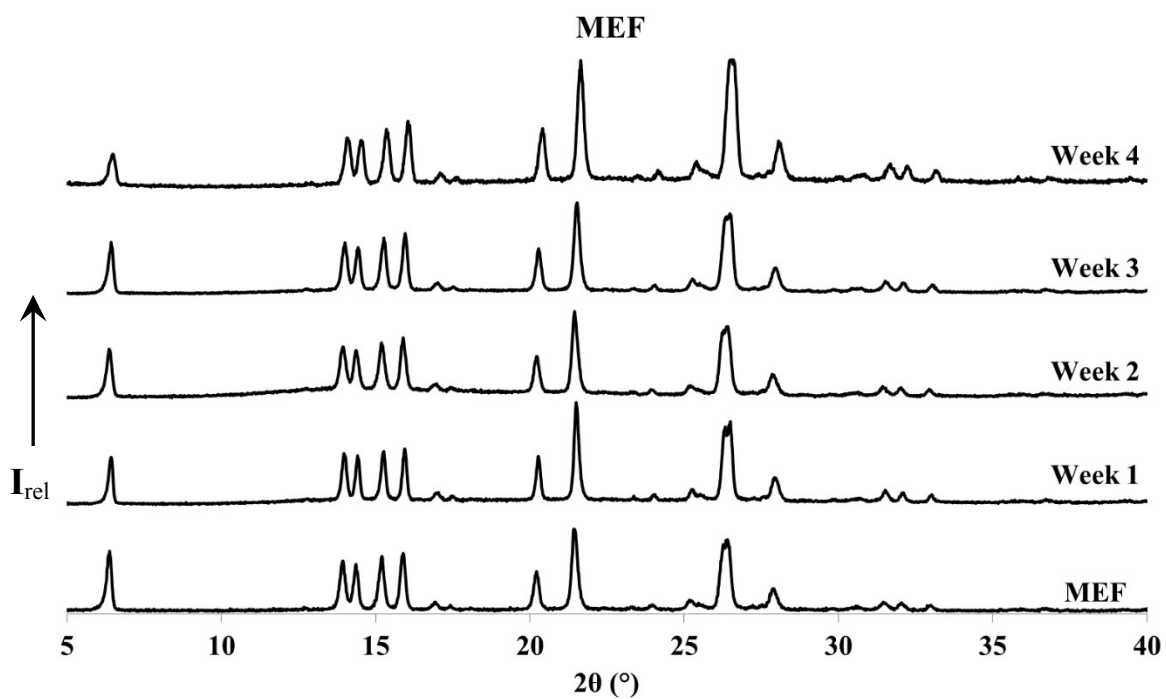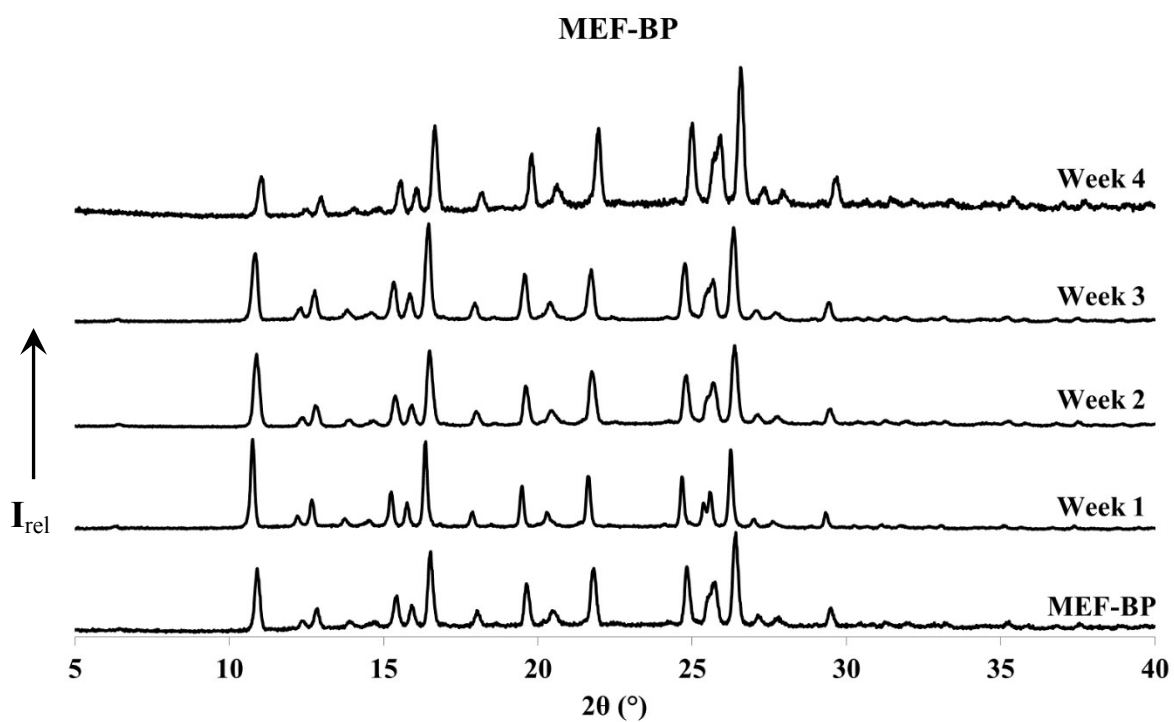

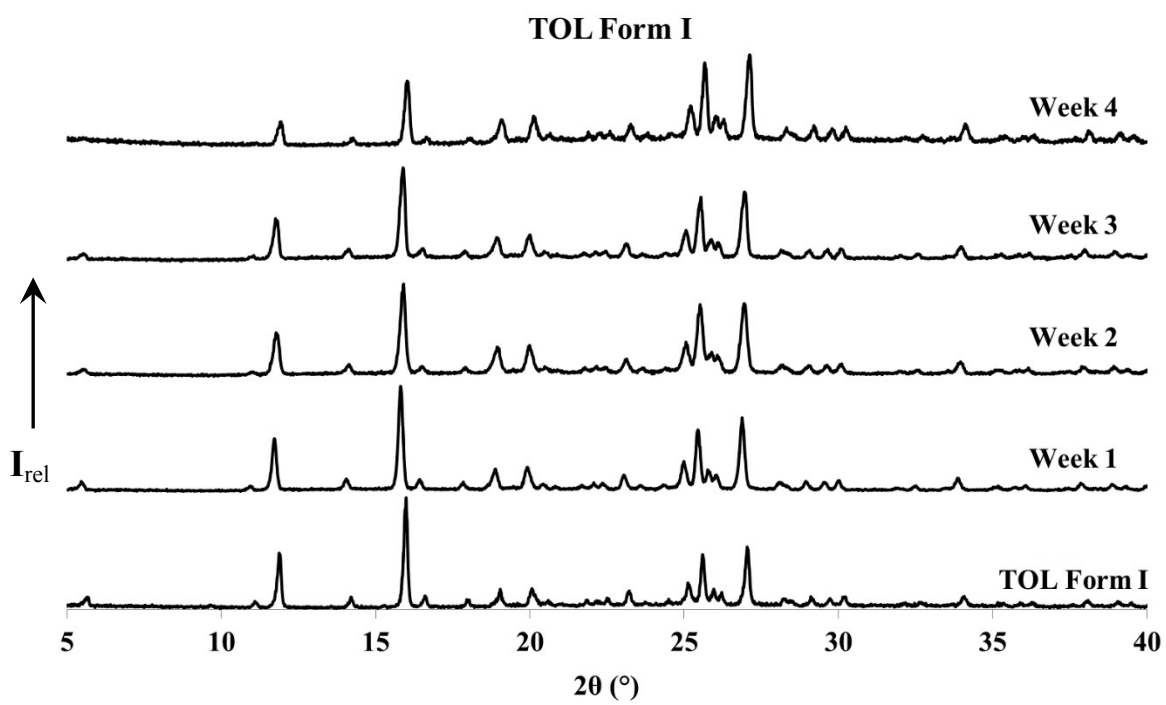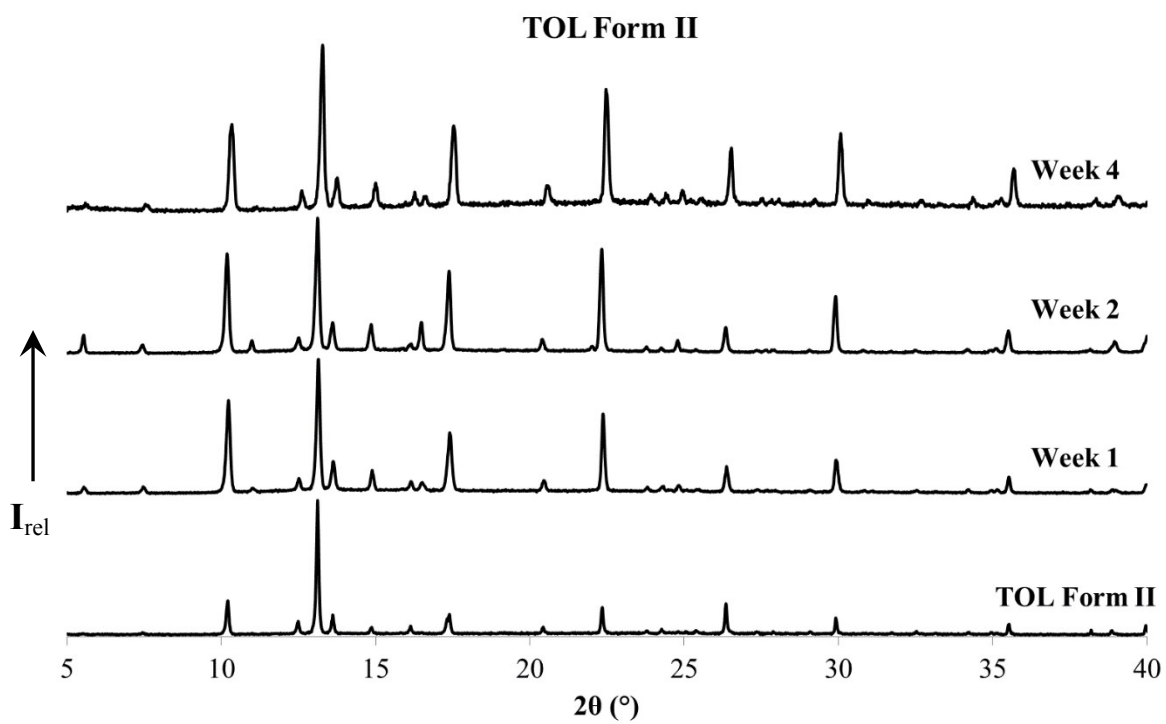

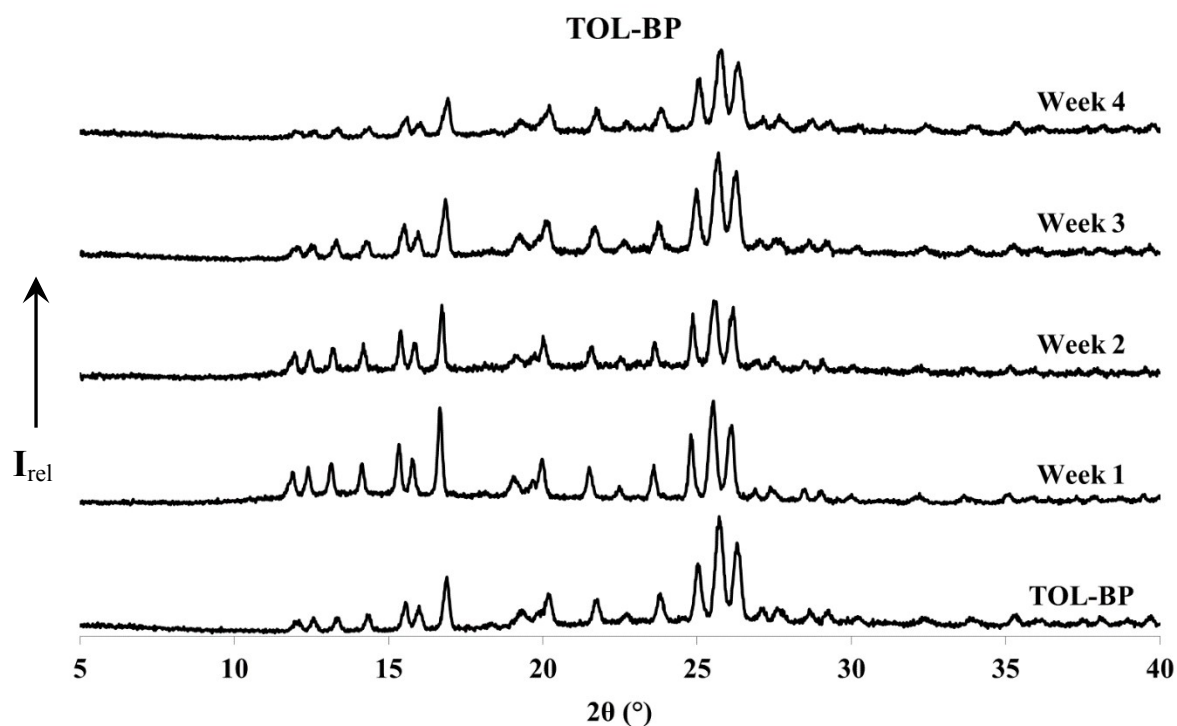

**Fig. S7** PXRD patterns illustrating the stability of the fenamic acid co-crystals with 4,4'-bipyridine under harsh humidity conditions (45 °C and 80 % R.H.)

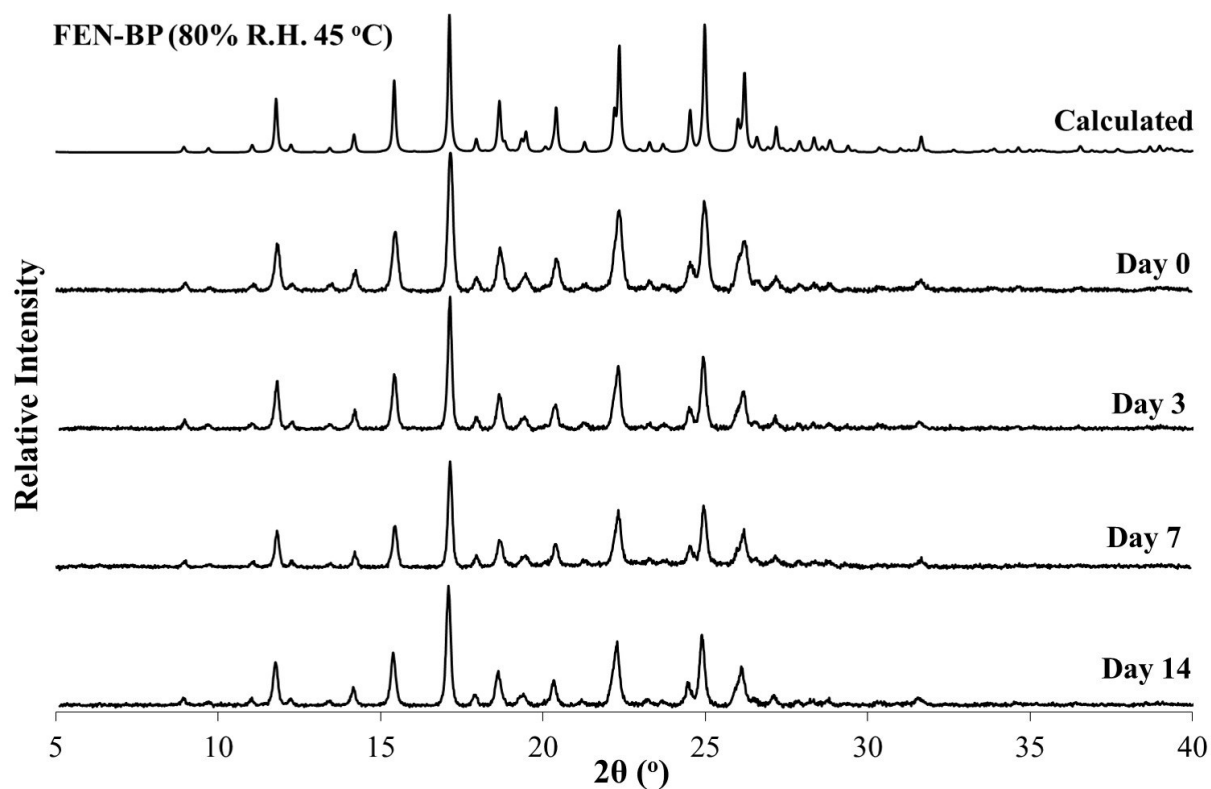

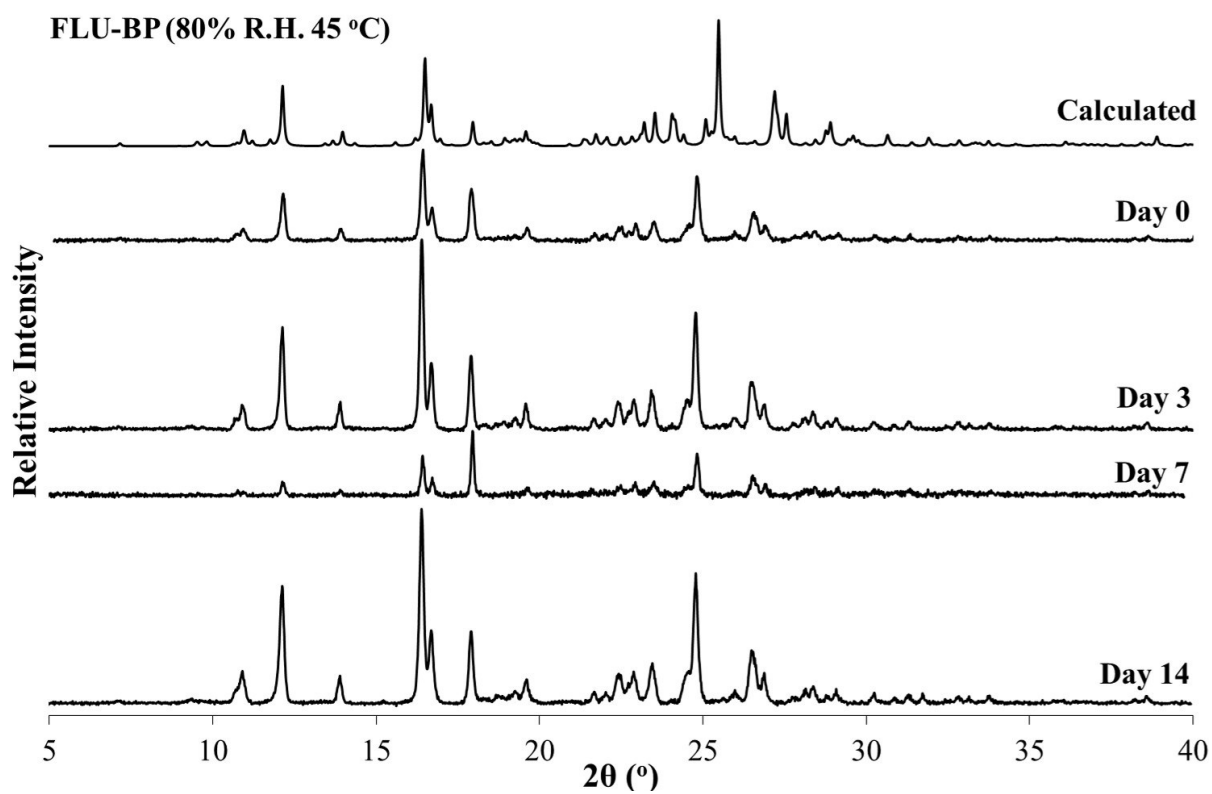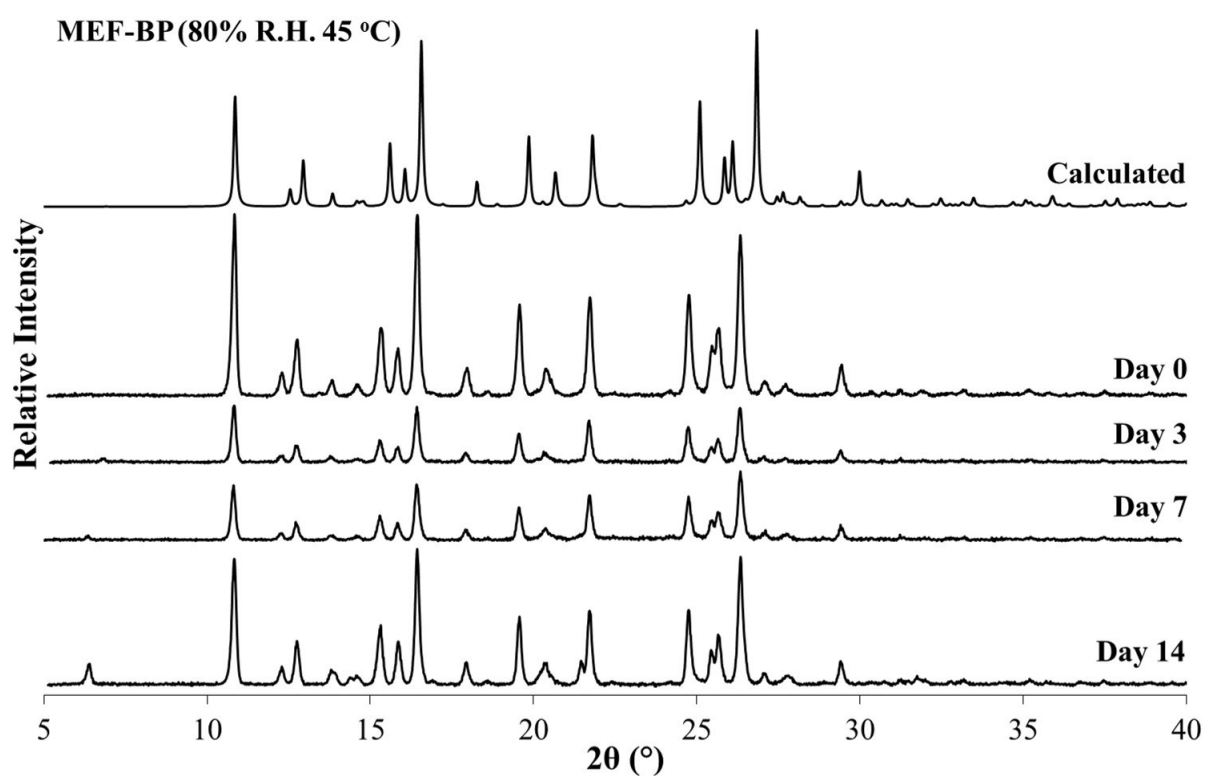

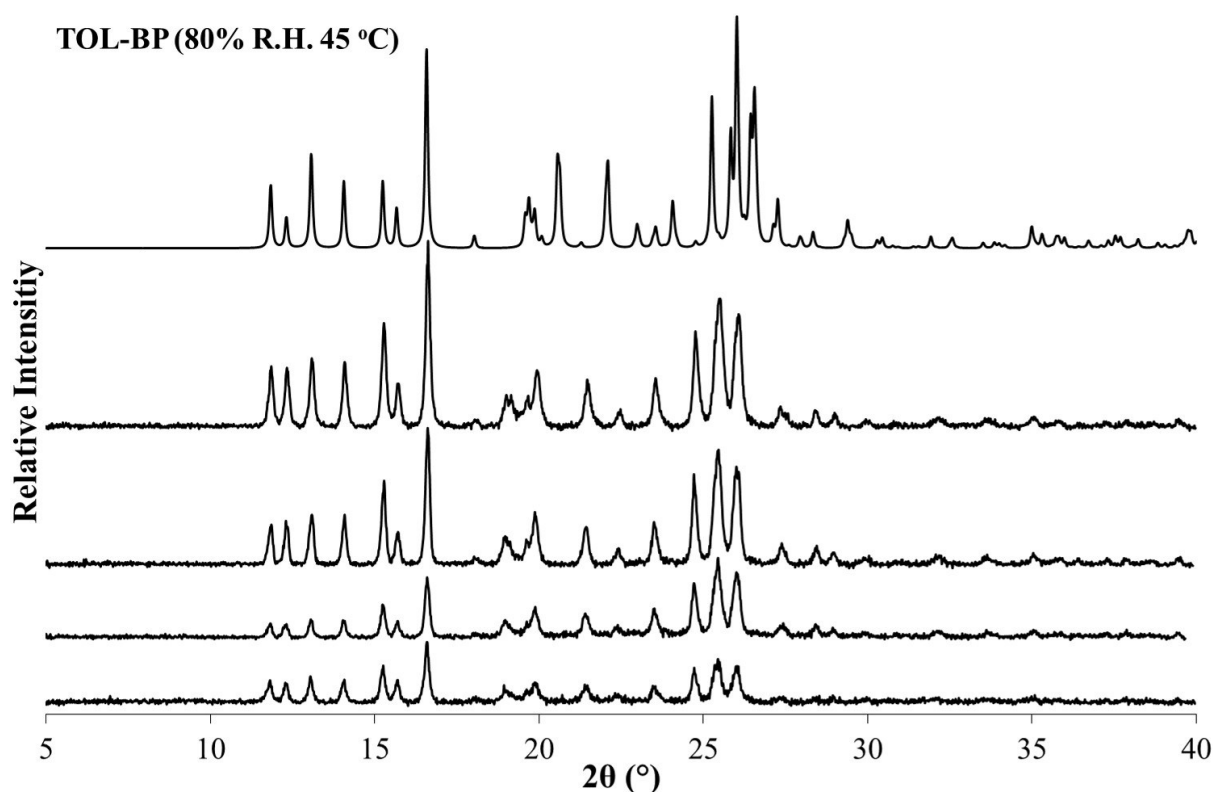

**\*Note.** Shifts in the calculated patterns for FLU-BP, MEF-BP and TOL-BP are due to the low temperatures (150 K) at which the single crystal X-ray data was collected.

## References

- 1 A. O. Surov, A. A. Simagina, N. G. Manin, L. G. Kuzmina, A. V. Churakov and G. L. Perlovich, *Cryst. Growth Des.*, 2014, 10.1021/cg5012633.
- 2 S. Kumaresan, P. G. Seethalakshmi, P. Kumaradhas and B. Devipriya. *J. Mol. Struct.* 2013, **1032**, 169-175.
- 3 S. Aitipamula, A. B. H. Wong, P. S. Chow and R. B. H. Tan, *CrystEngComm*, 2014, **16**, 5793-5801.
- 4 S. SeethaLekshmi and T. N. Guru Row, *Cryst. Growth Des.*, 2012, **12**, 4283-4289.
- 5 V. López-Mejías, J. W. Kampf and A. J. Matzger, *J. Am. Chem. Soc.*, 2009, **131**, 4554-4555.
- 6 V. López-Mejías, J. W. Kampf and A. J. Matzger, *J. Am. Chem. Soc.*, 2012, **134**, 9872-9875.
